# Supplementary material for: Hepatitis E Virus Genotype 3 Diversity: Phylogenetic Analysis and Presence of Subtype 3b in Wild Boar in Europe
Source: MDPI journal article supplement (doi:10.3390/v7052704), 2015-05-22
Supplement: s1 [file s1]

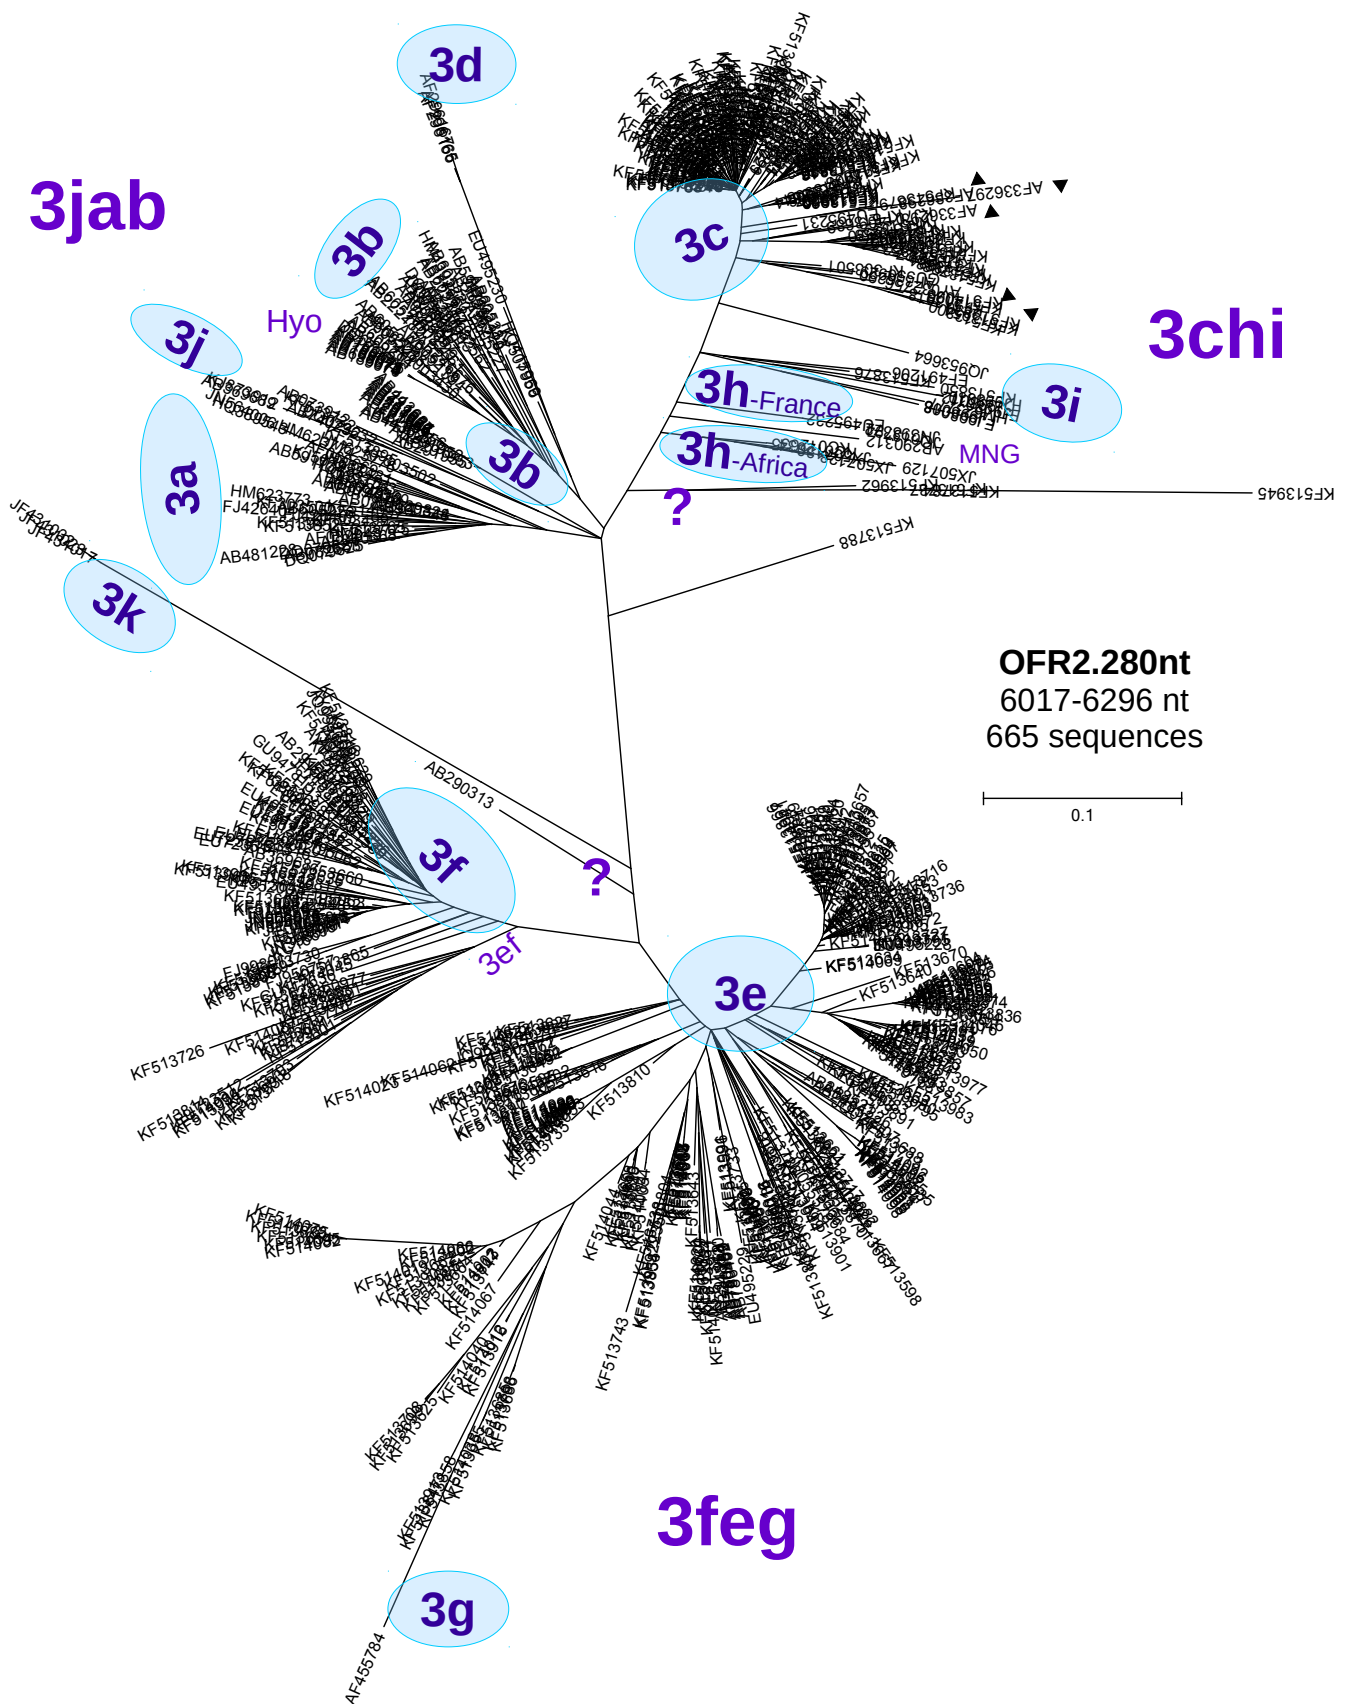

**Supplem Figure 03b.** Molecular phylogenetic analysis of: ORF2.280nt (left): 665 partial HEV-3 genome sequences spanning the region Burma.M73218 : 6017-6296 nt

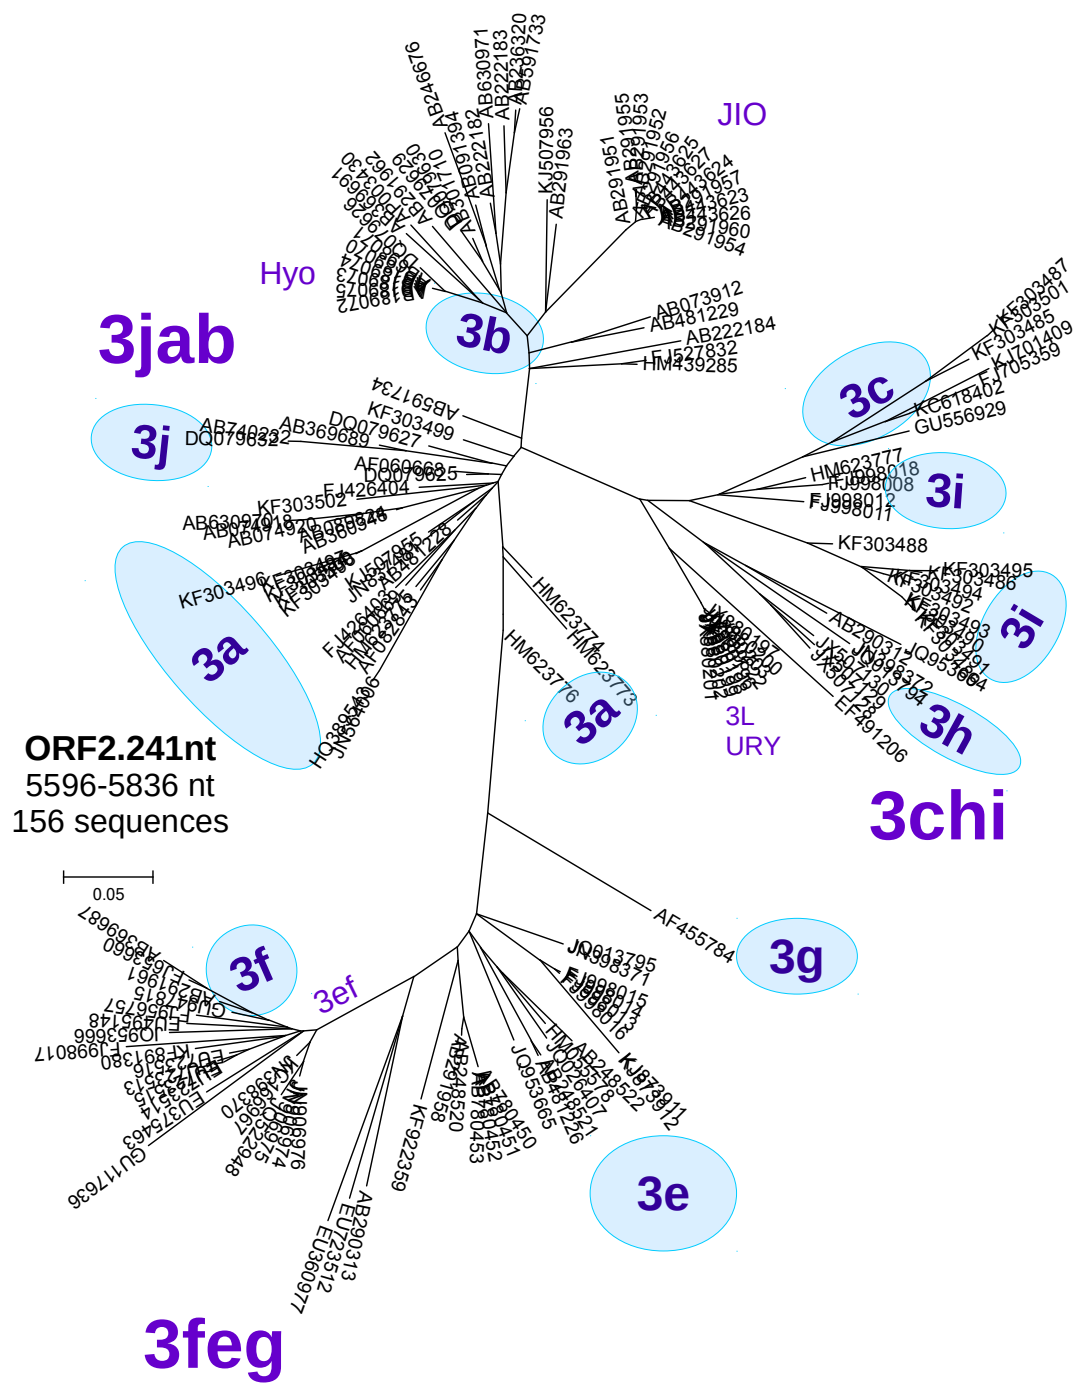

Supplem Figure 03c. ORF2.241nt: 156 partial HEV-3 genome sequences spanning the region  
Burma.M73218 : 5596-5836 nt
