# Supplementary material for: Hepatitis E Virus Genotype 3 Diversity: Phylogenetic Analysis and Presence of Subtype 3b in Wild Boar in Europe
Source: MDPI journal article supplement (doi:10.3390/v7052704), 2015-05-22
Supplement: s1 [file s1]

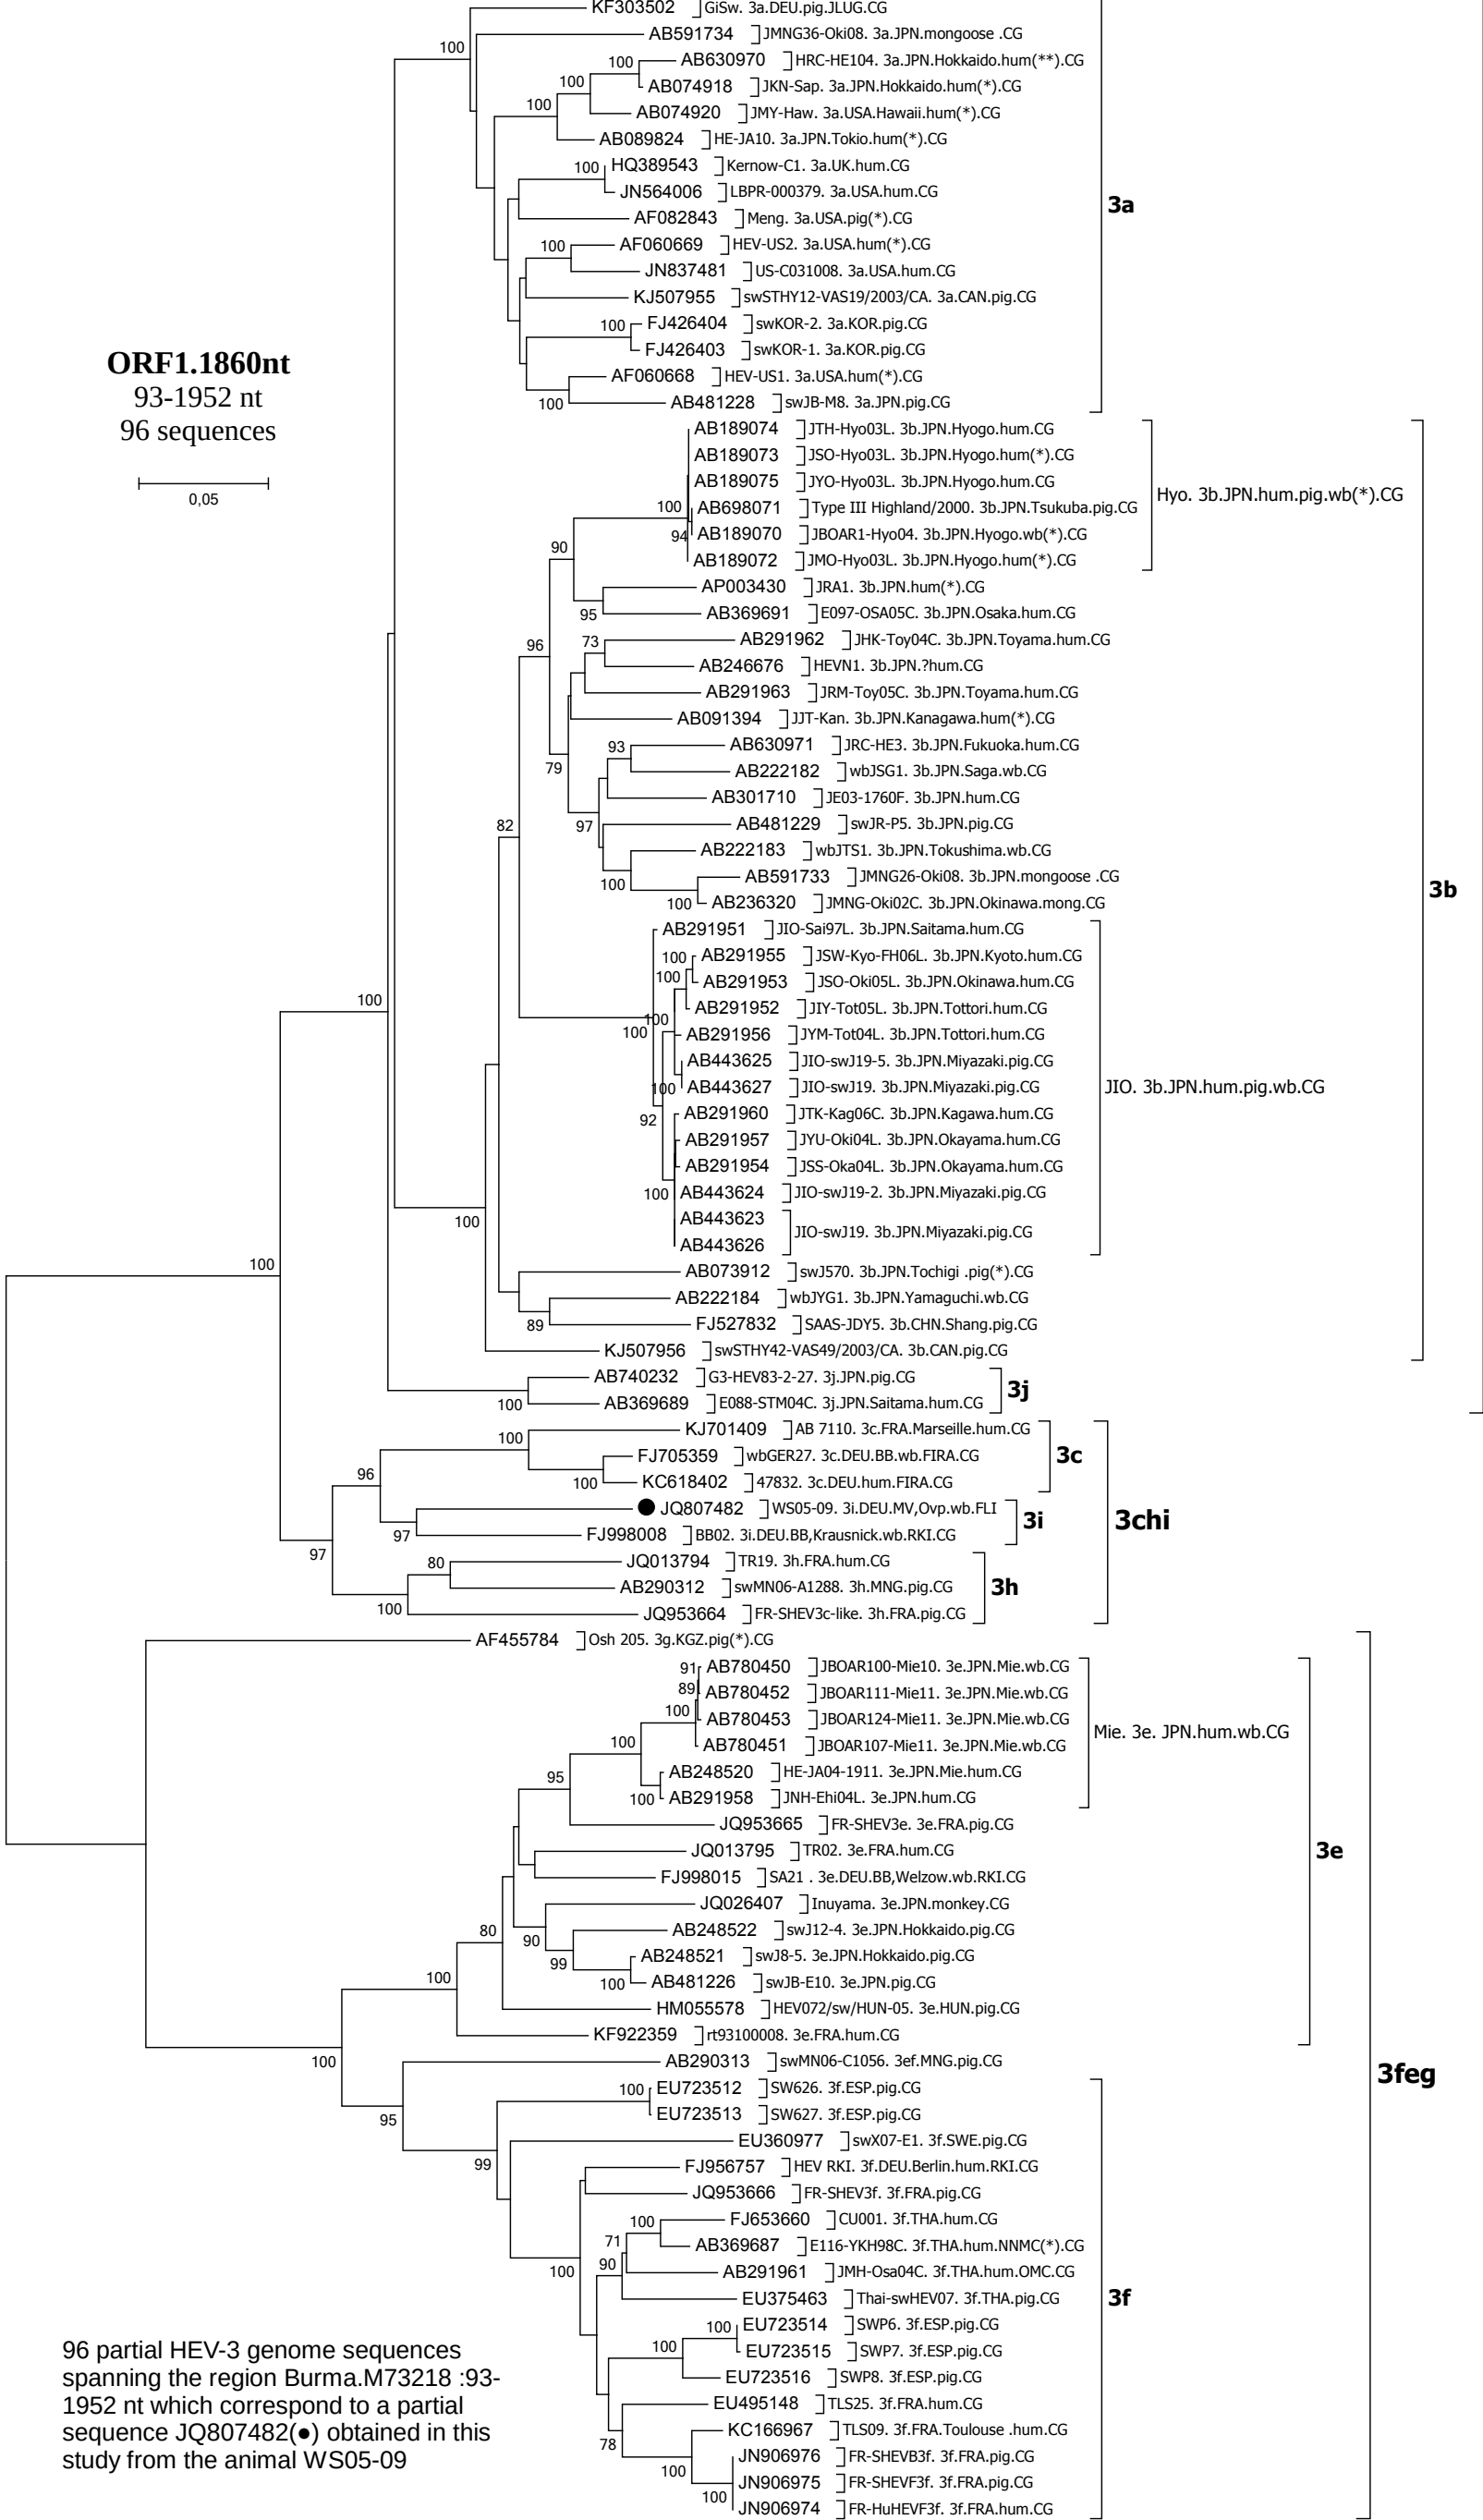

96 partial HEV-3 genome sequences spanning the region Burma.M73218 :93-1952 nt which correspond to a partial sequence JQ807482(●) obtained in this study from the animal WS05-09
