# Supplementary figures and images for: Hepatitis E Virus Genotype 3 Diversity: Phylogenetic Analysis and Presence of Subtype 3b in Wild Boar in Europe
Source: MDPI journal article supplement (doi:10.3390/v7052704), 2015-05-22

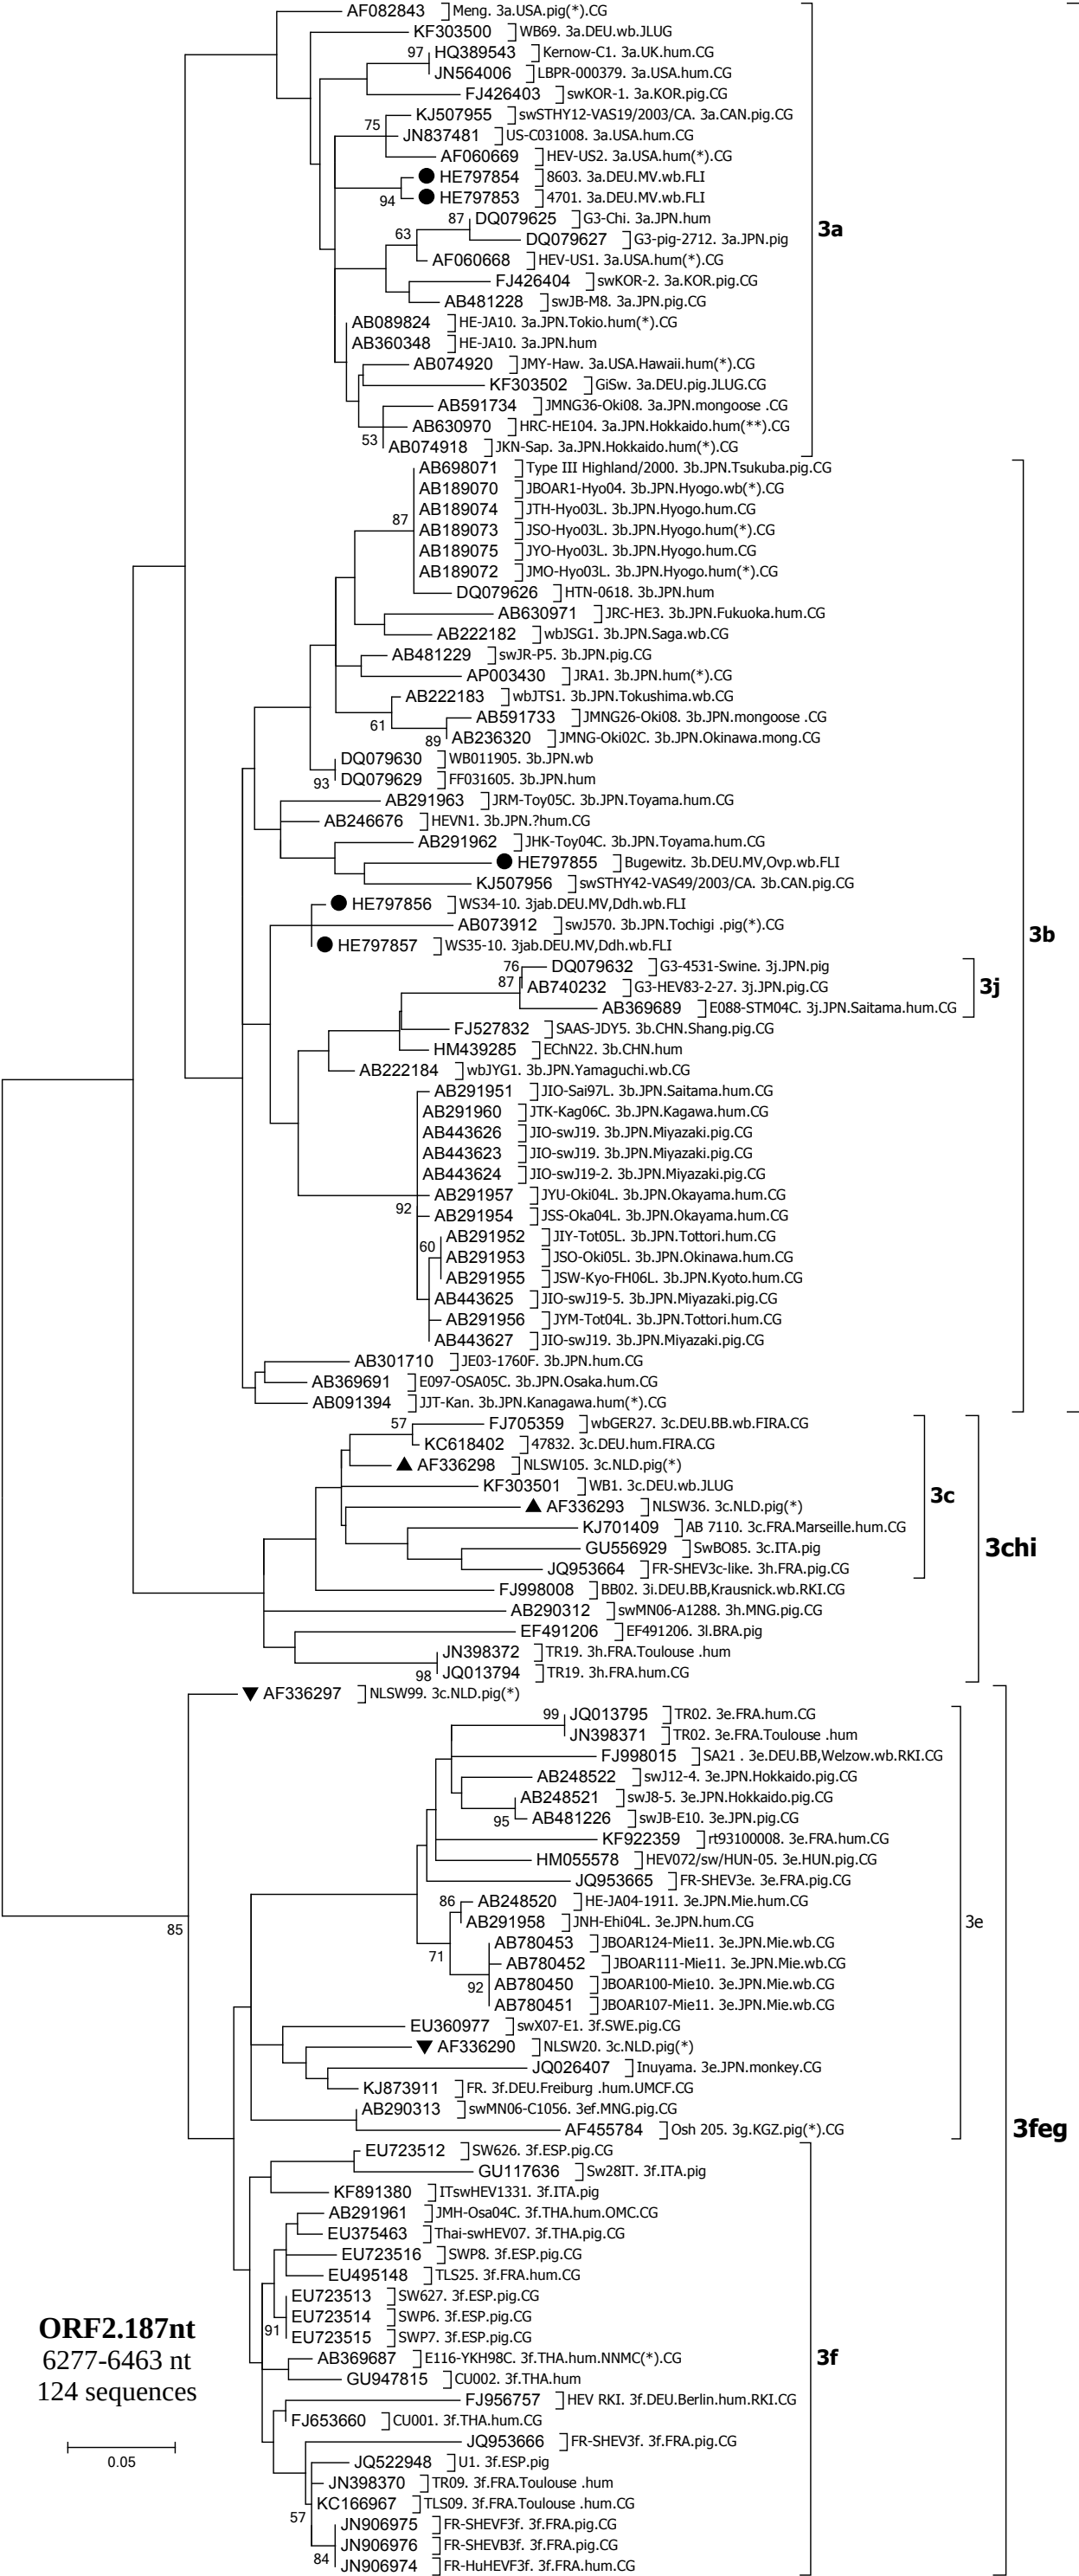

ORF2.187nt  
6277-6463 nt  
124 sequences

0.05

Supplement: s1 [file s1]

**OFR1.371nt**  
80-450 nt

0.02

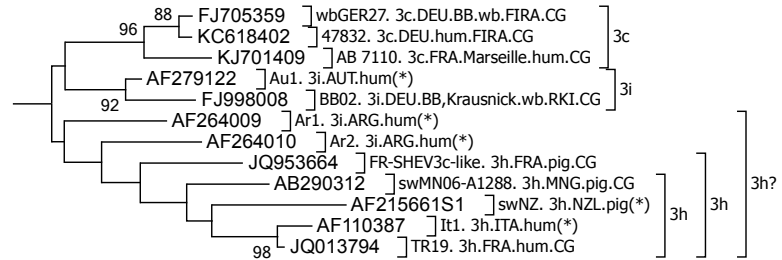

**OFR2.768nt**  
5504-6271 nt

0.02

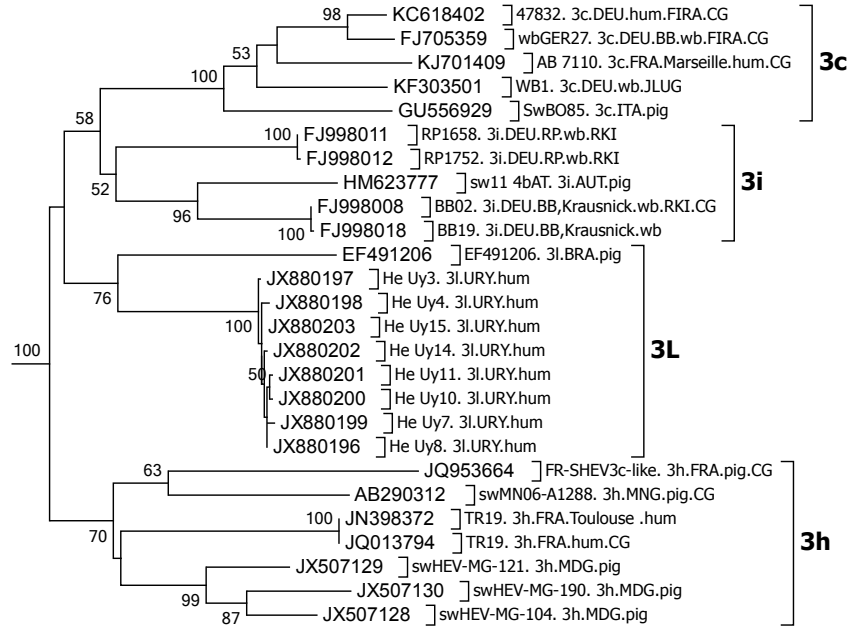

**OFR1.242nt**  
125-366 nt

0.02

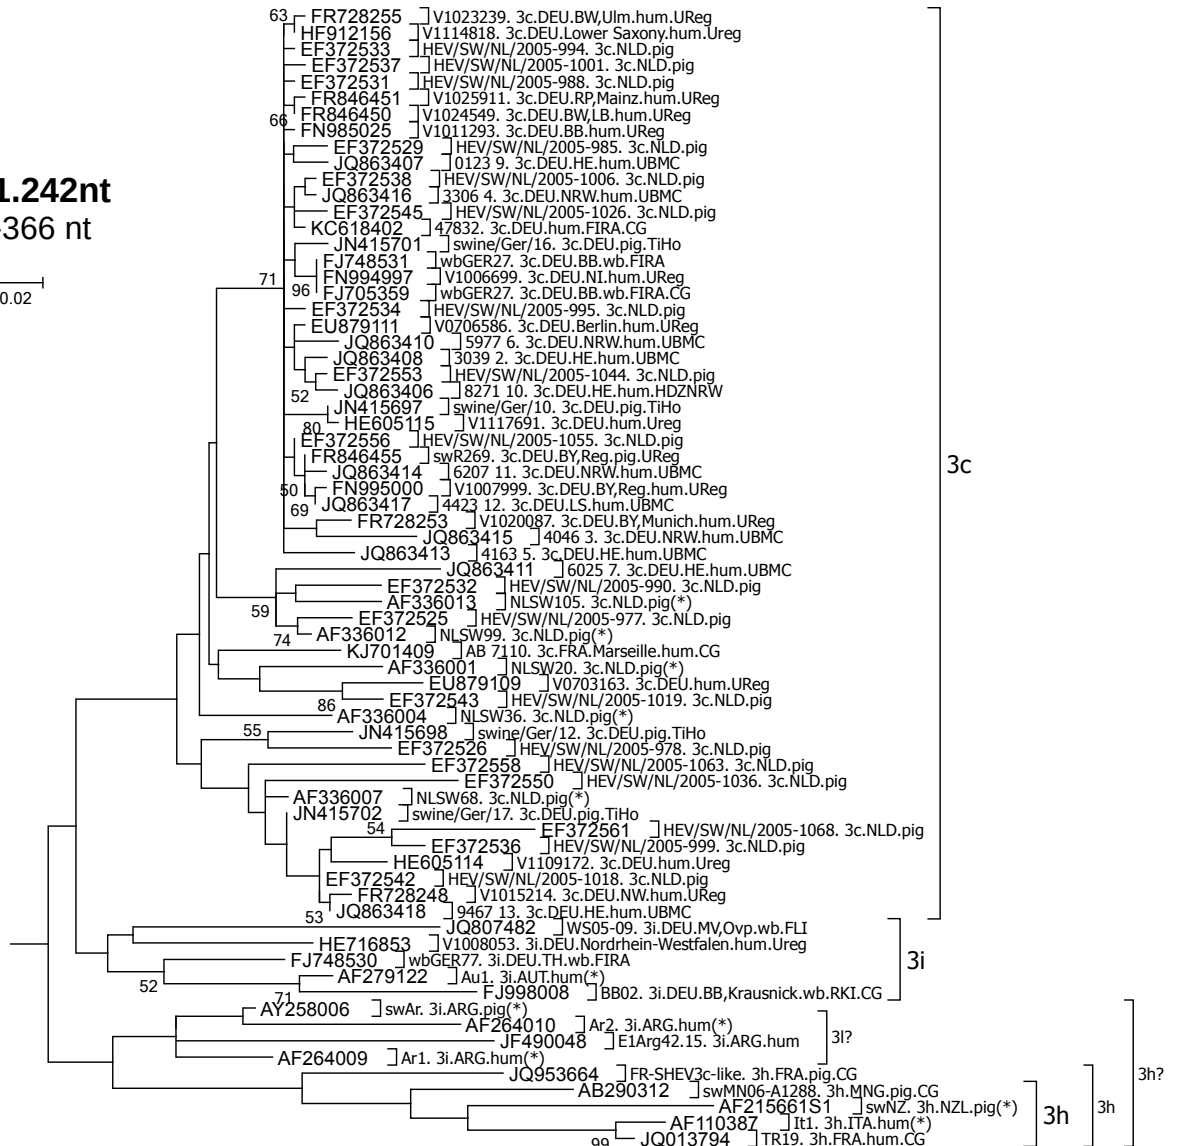

Supplement: s1 [file s1]

665 sequence



0.1

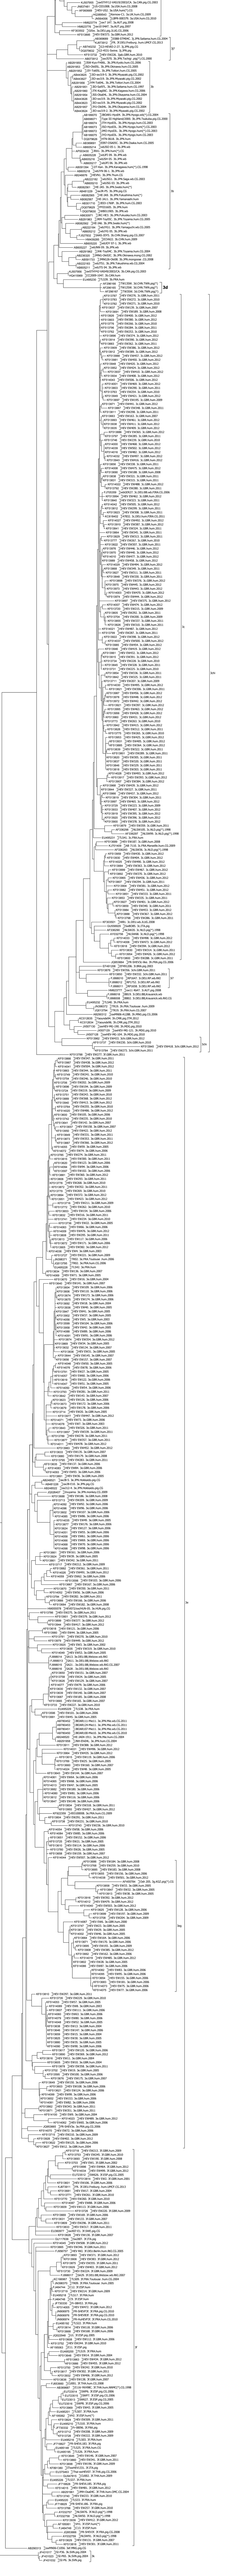

Supplement: s1 [file s1]

OFR1.242nt  
125-366 nt  
294 sequences

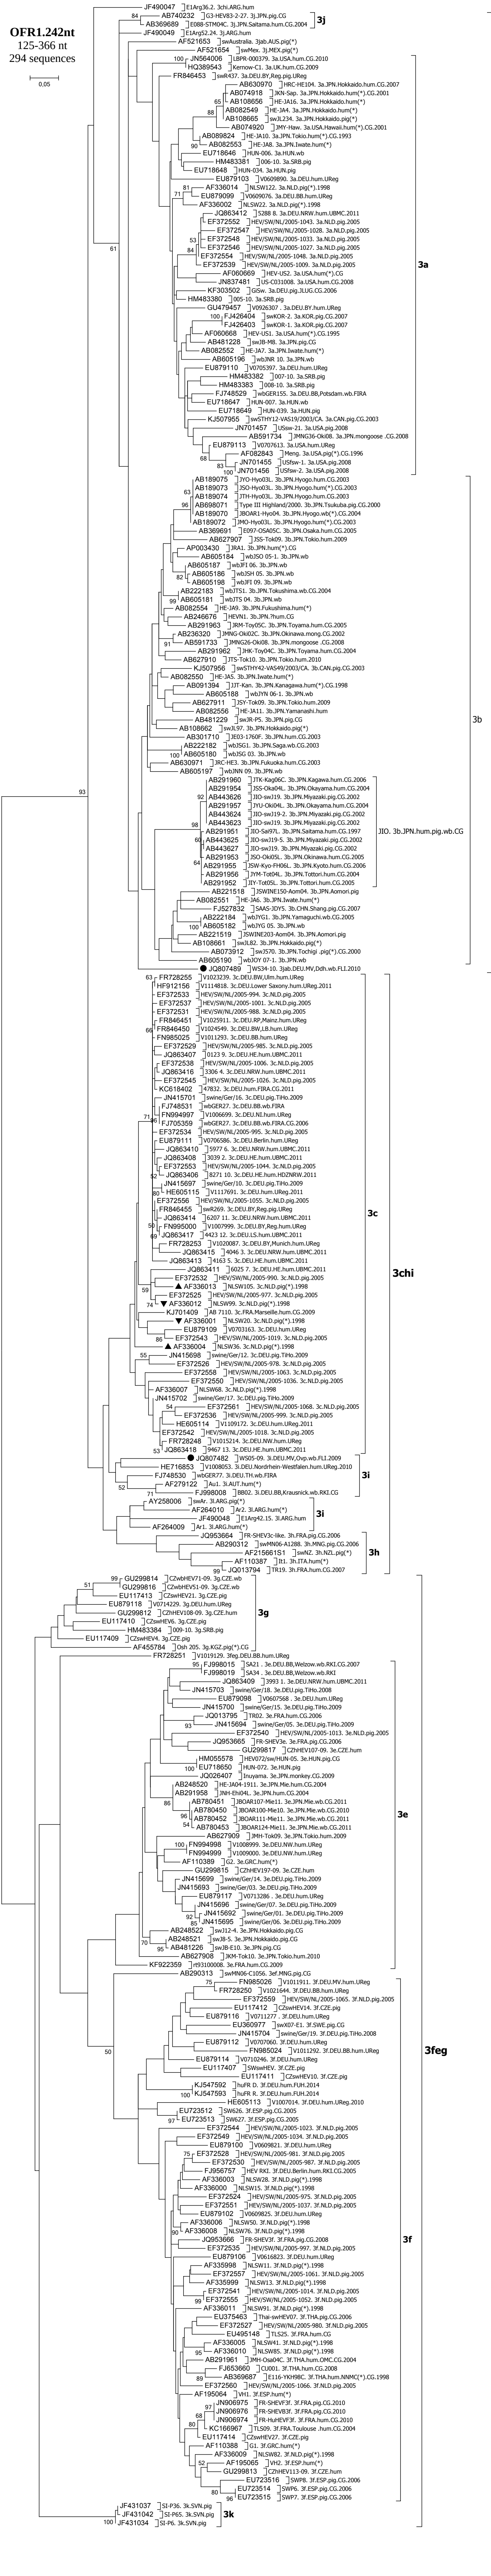

Supplement: s1 [file s1]

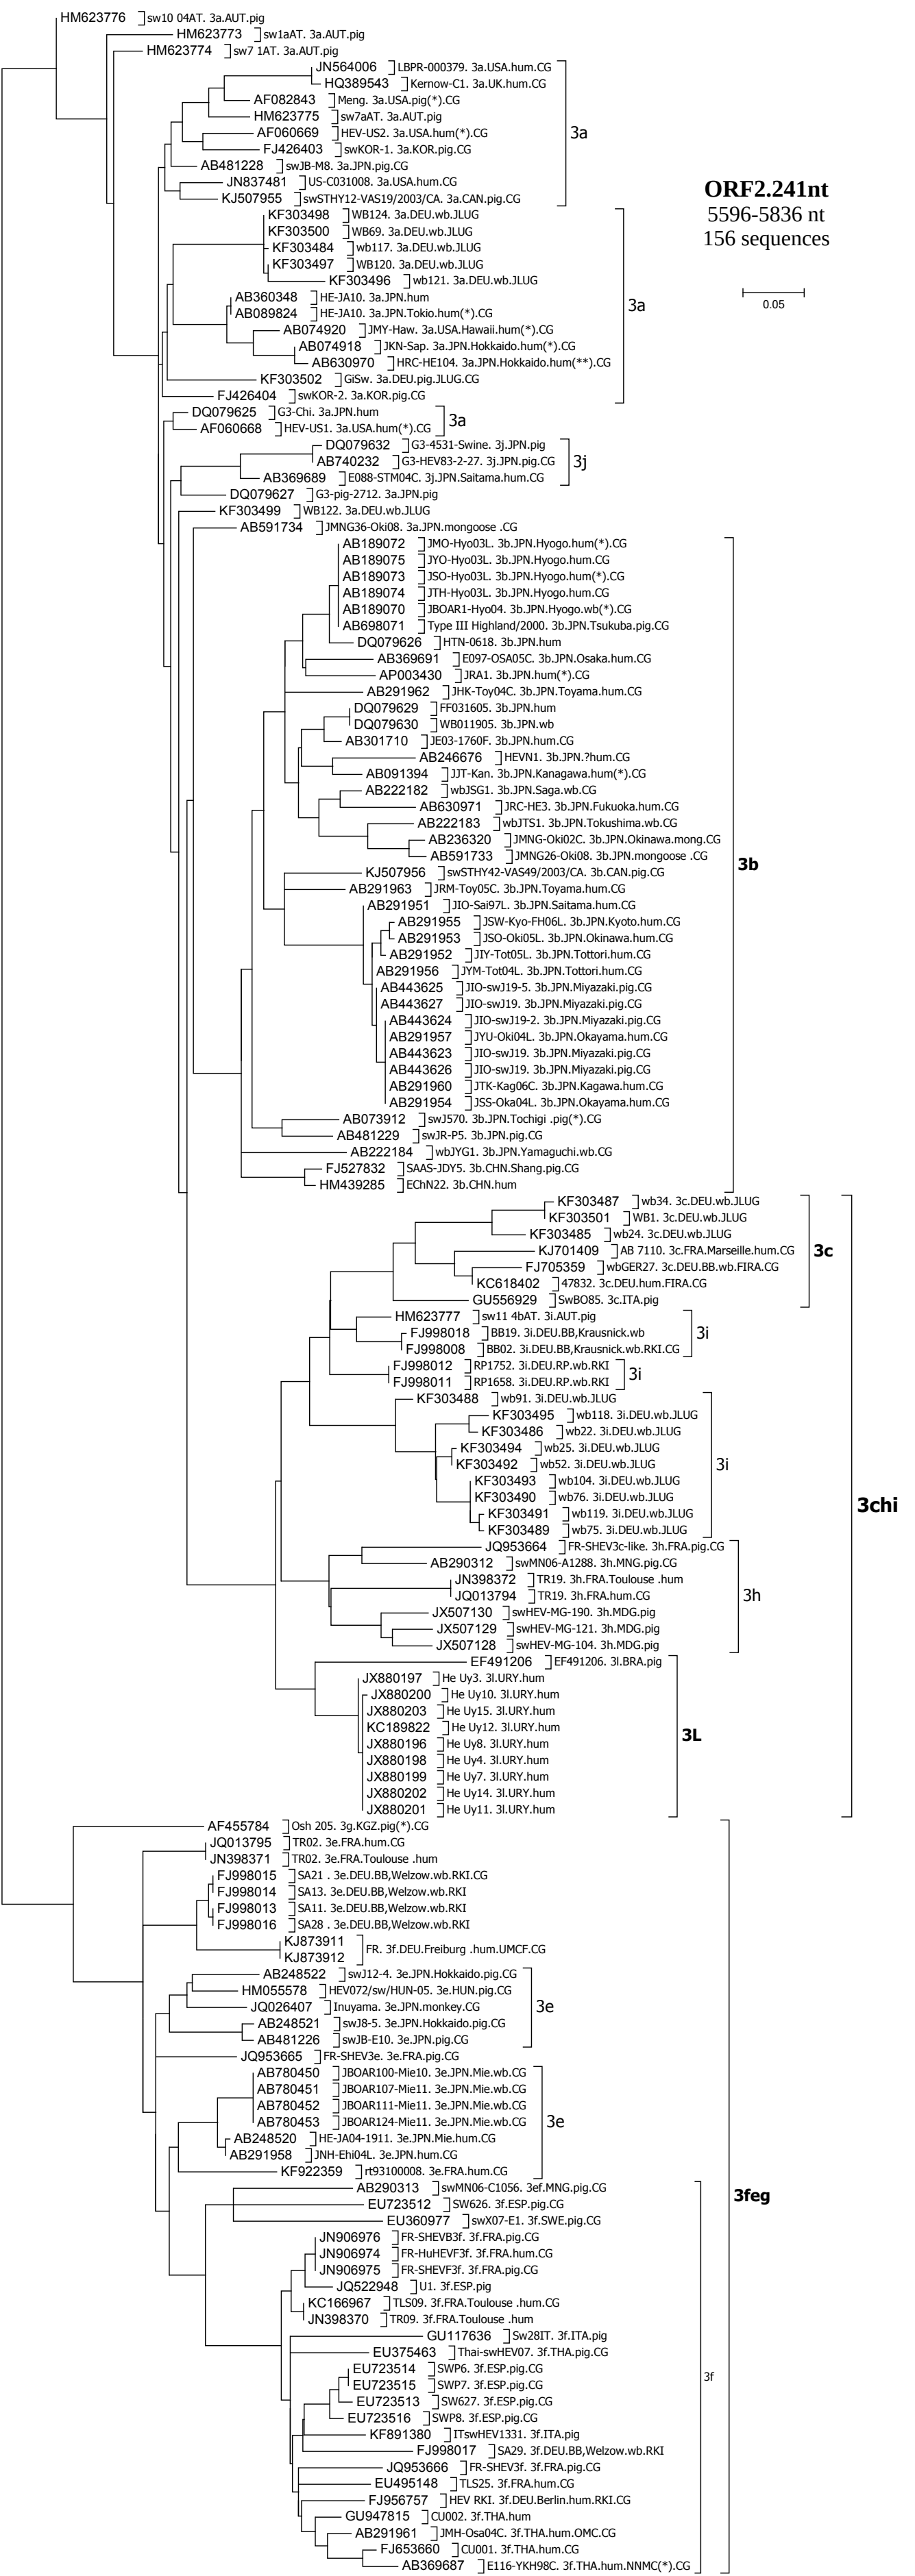

Supplement: s1 [file s1]

0.005

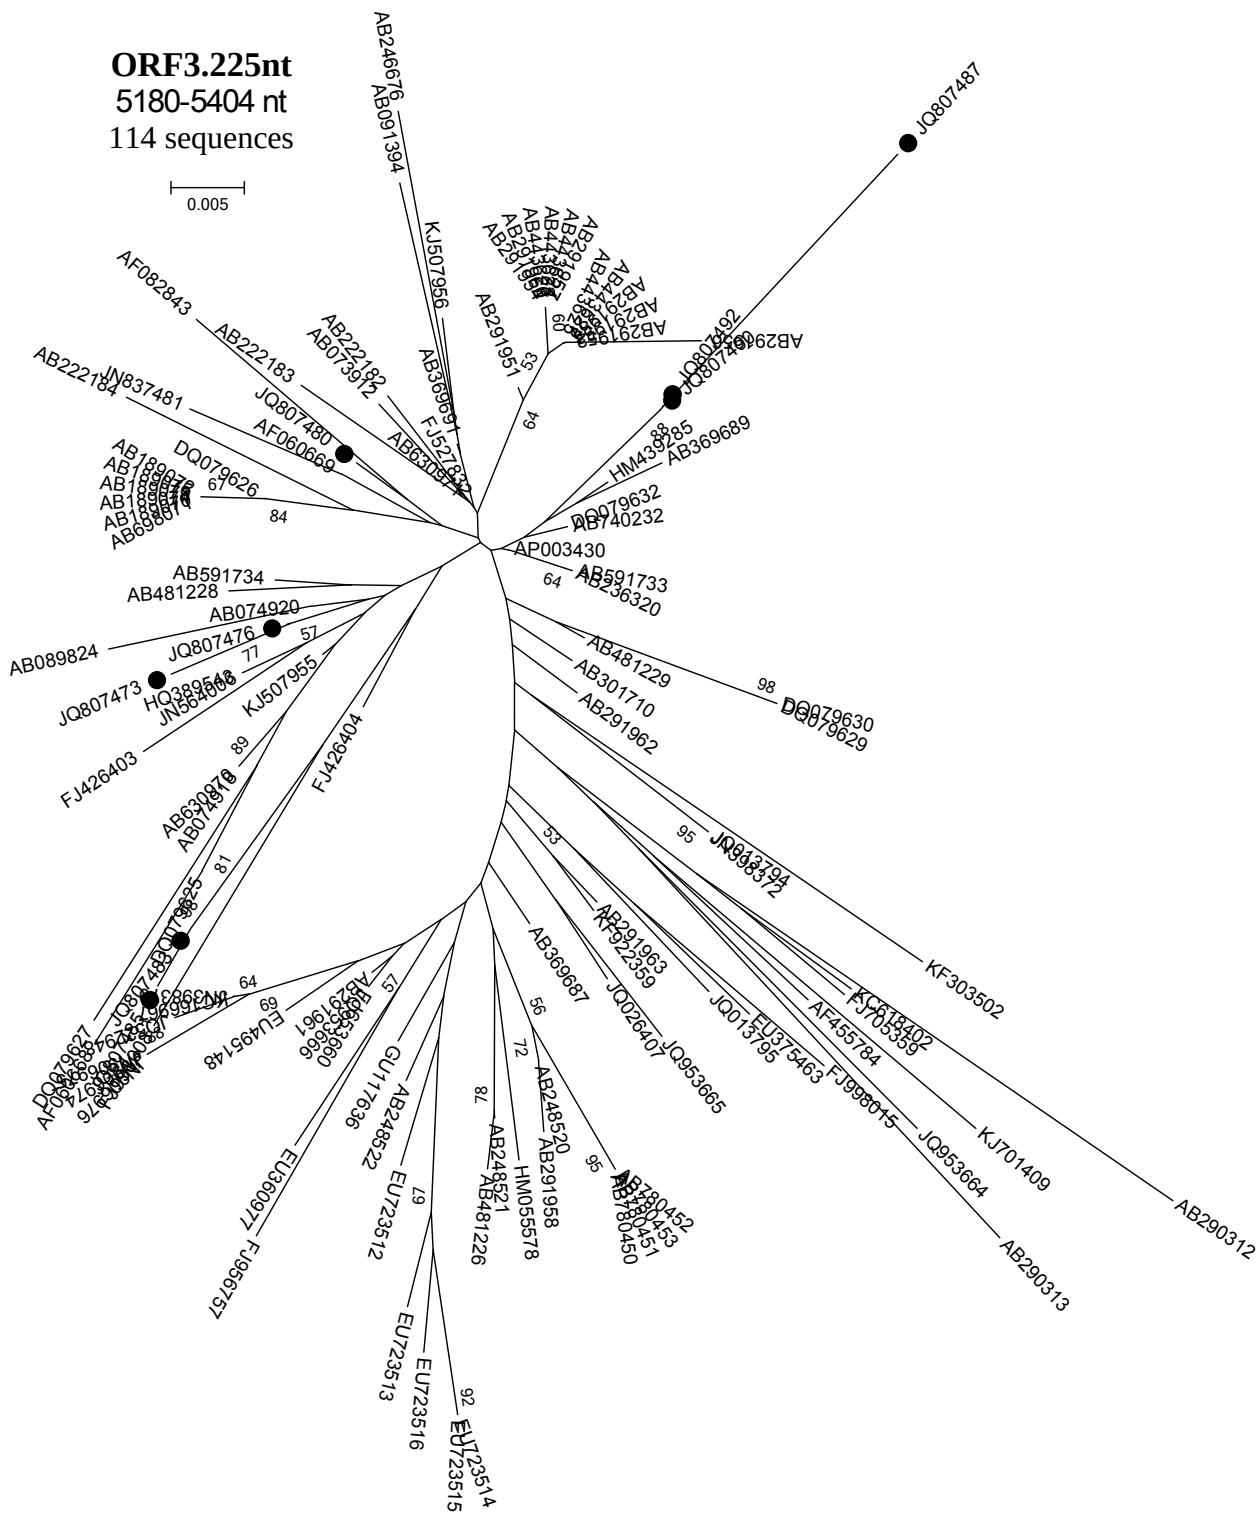

Supplement: s1 [file s1]

**RdRp.280nt**  
4284-4563 nt  
147 sequences

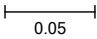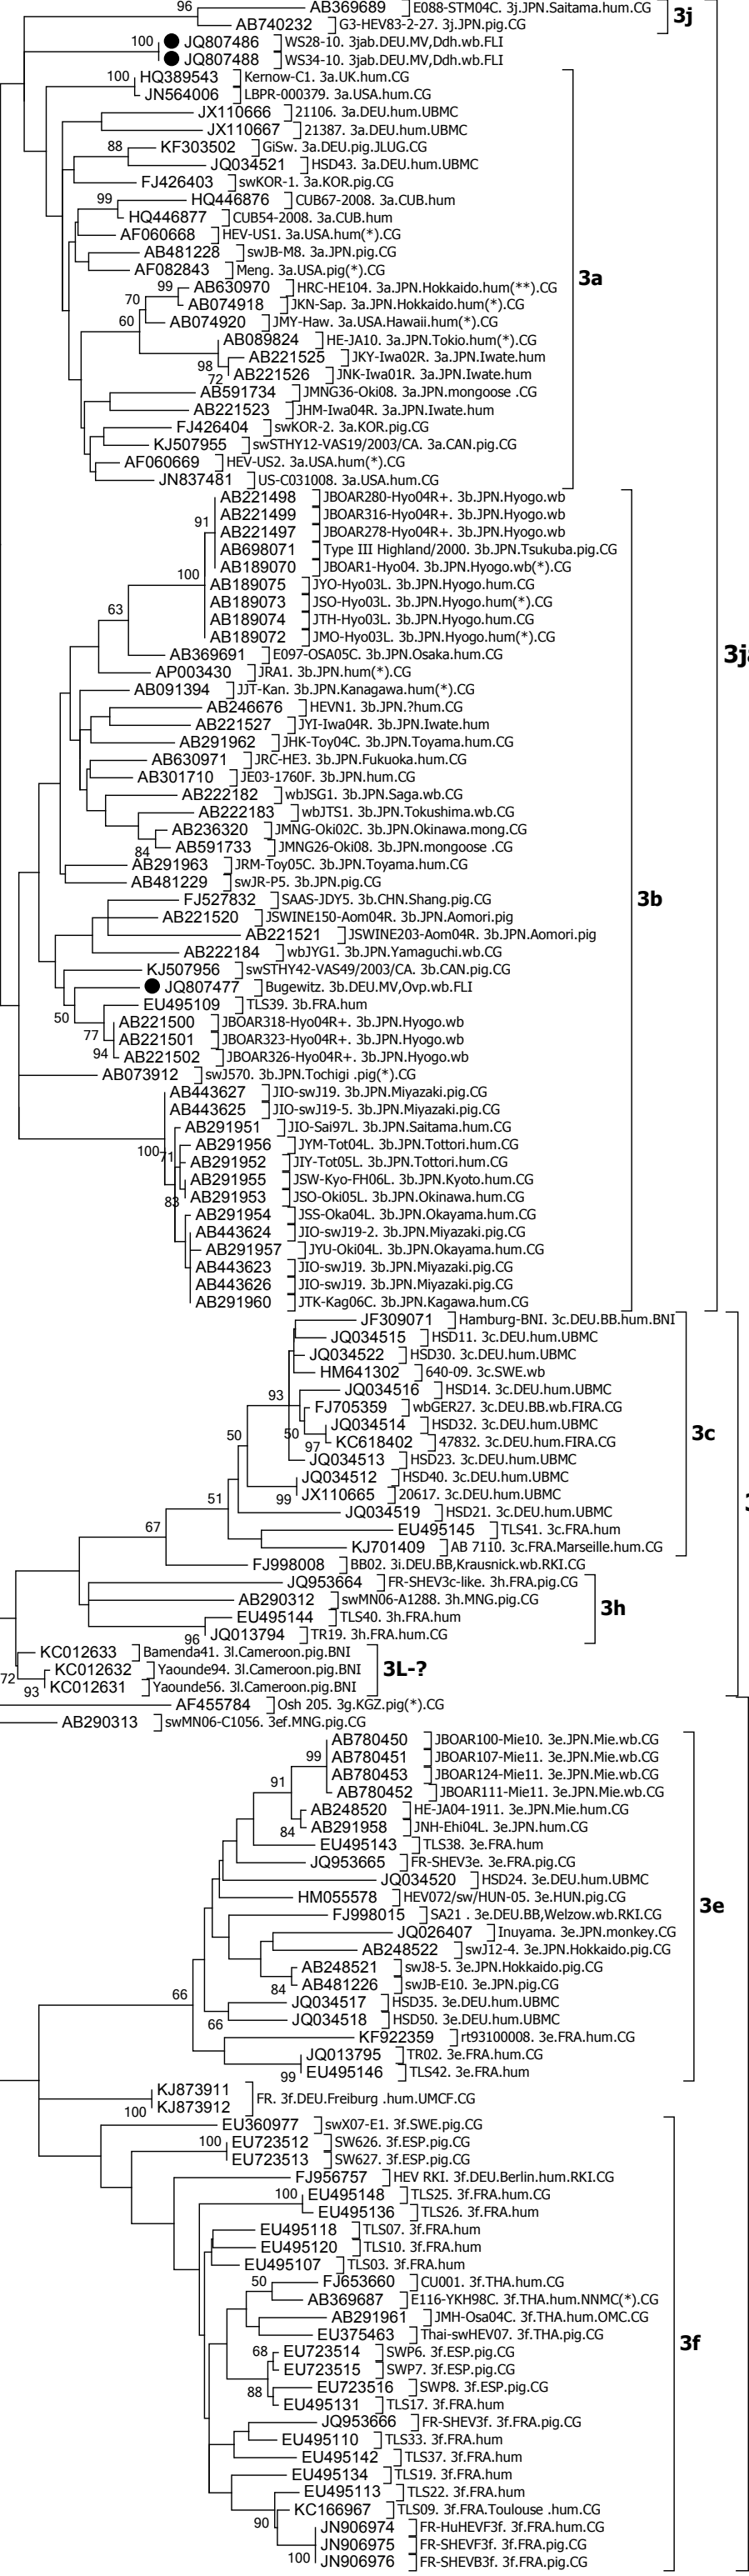

Supplement: s1 [file s1]

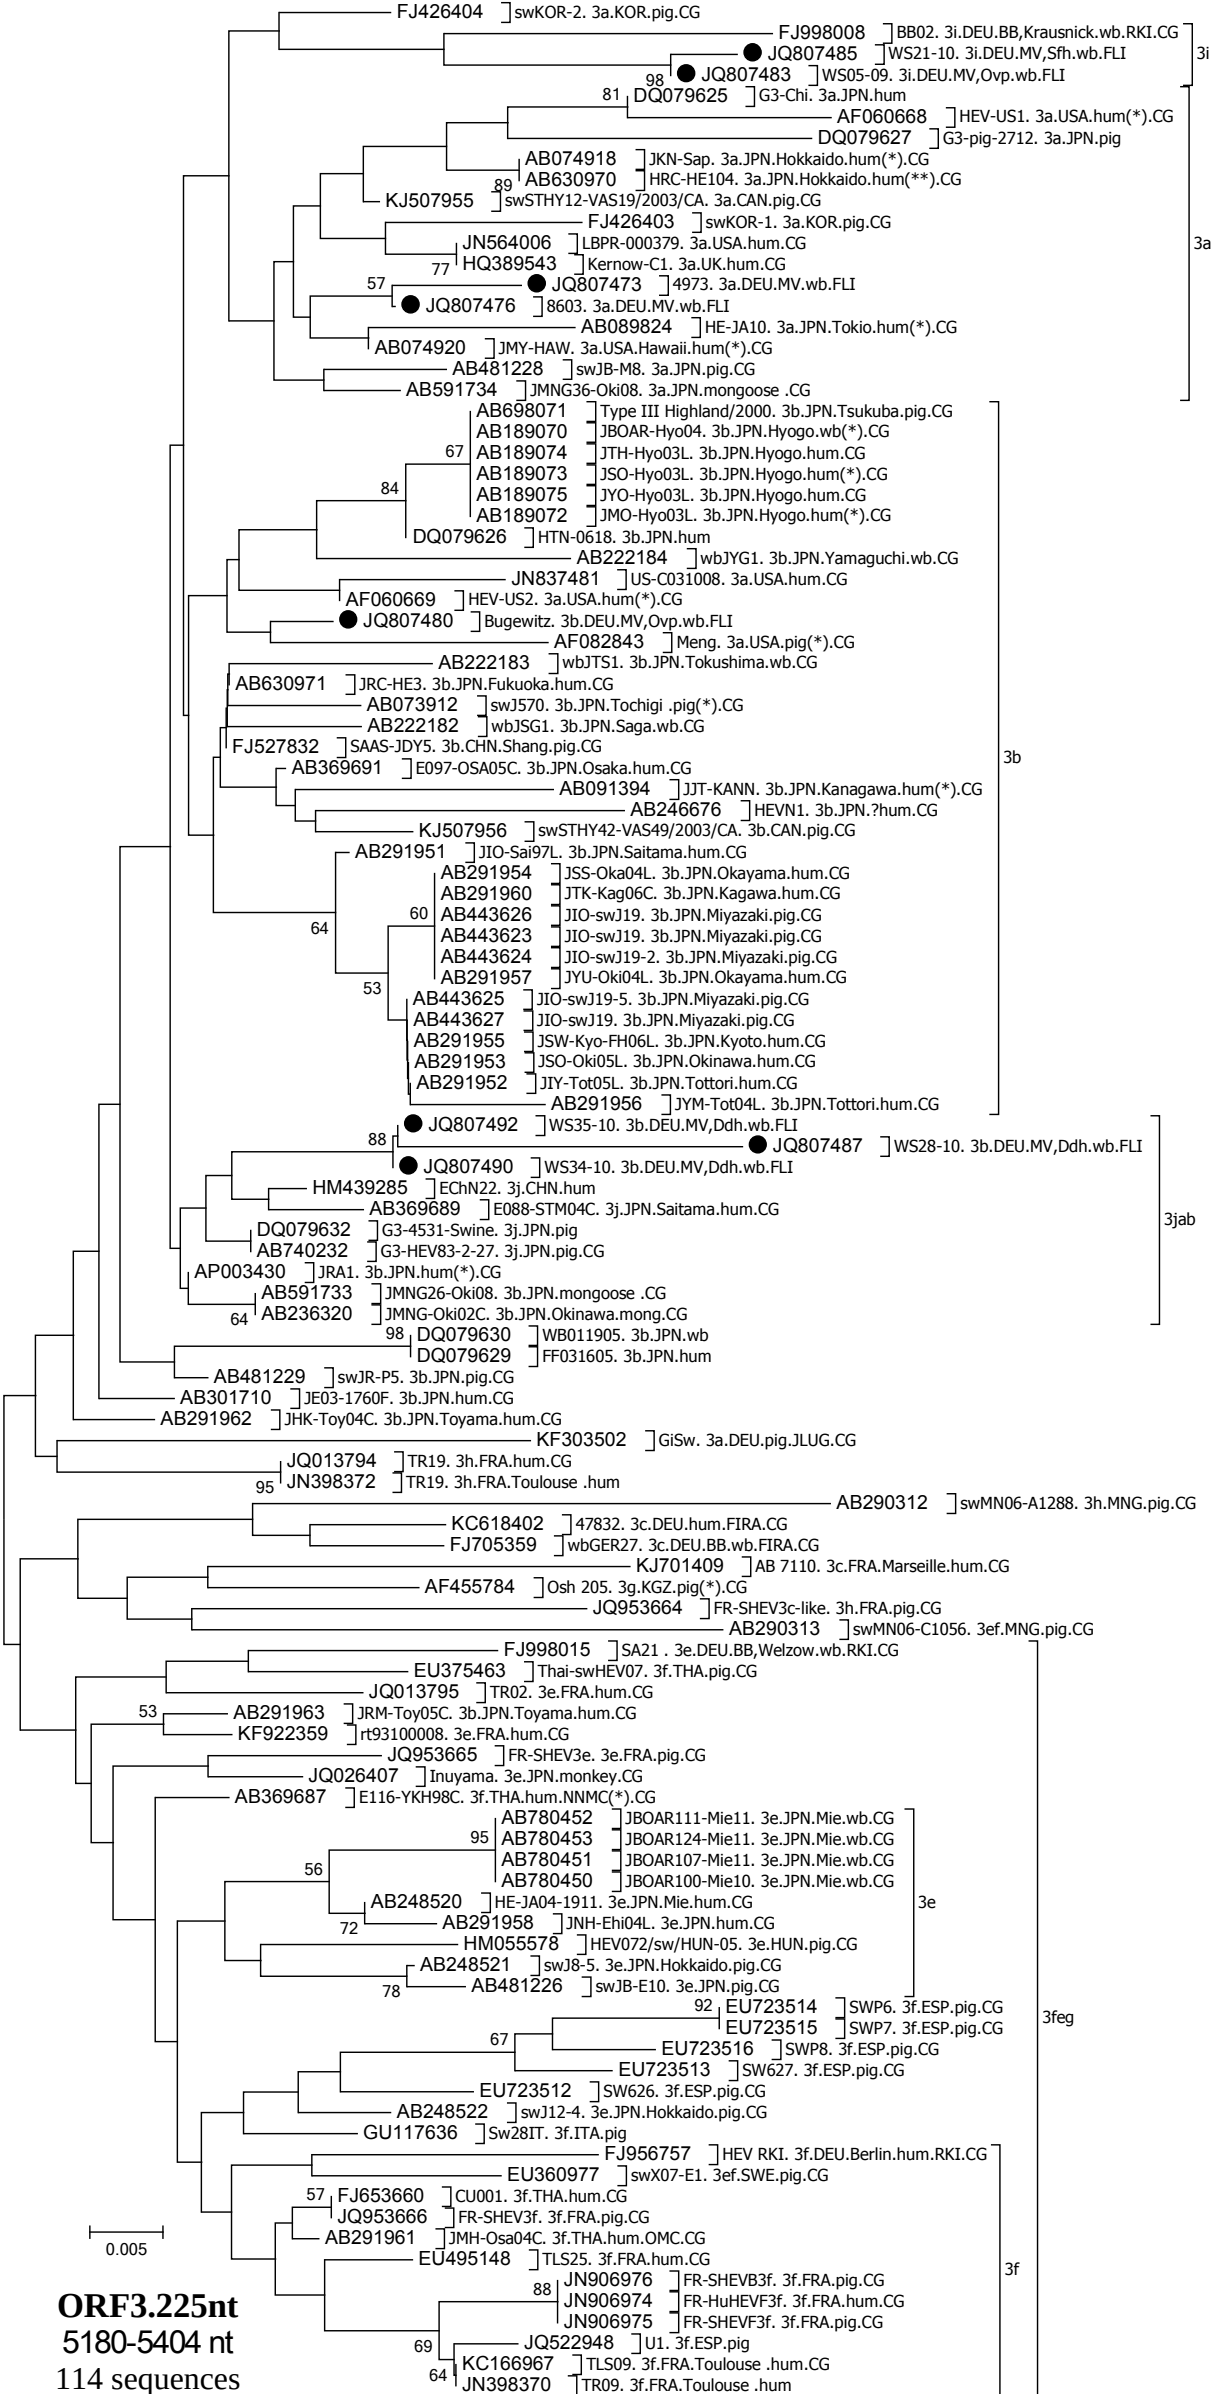

**ORF3.225nt**  
**5180-5404 nt**  
**114 sequences**

Supplement: s1 [file s1]

HVR.319nt  
2094-2412 nt  
126 sequences

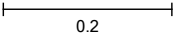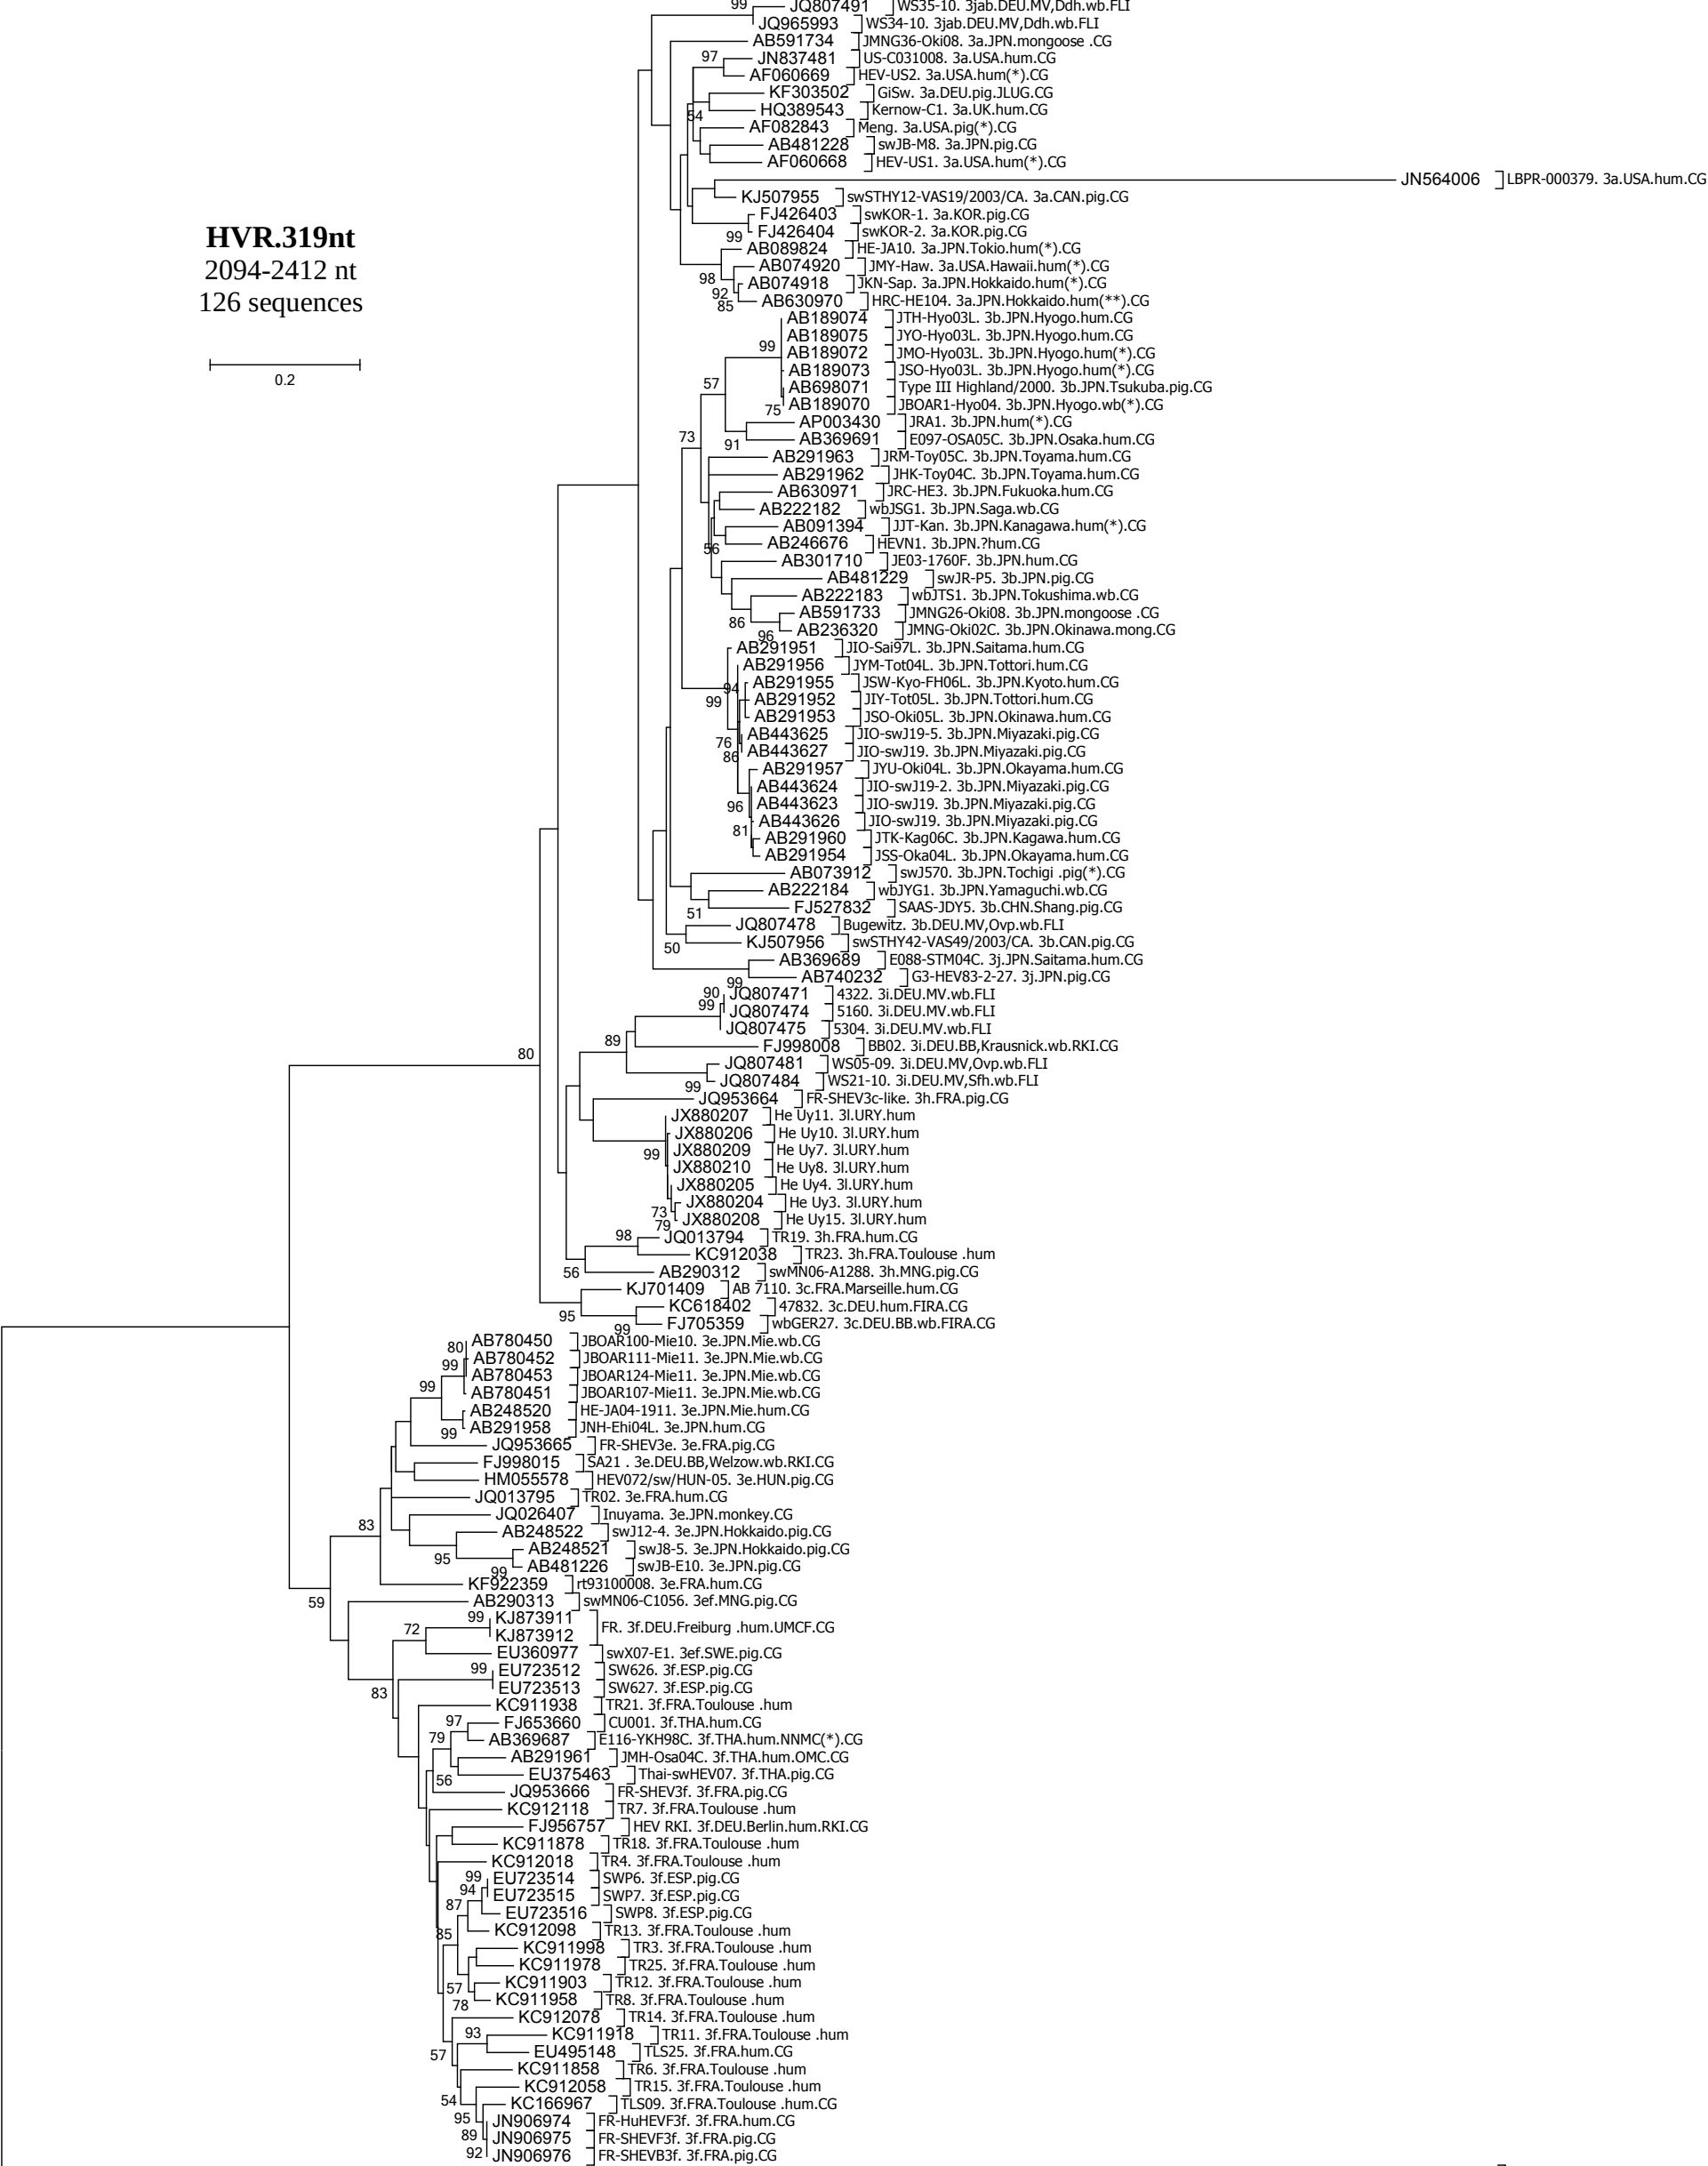

AF455784 Osh 205. 3g.KGZ.pig(\*) .CG

Supplement: s1 [file s1]

**ORF1.318nt**  
61-378 nt  
124 sequences

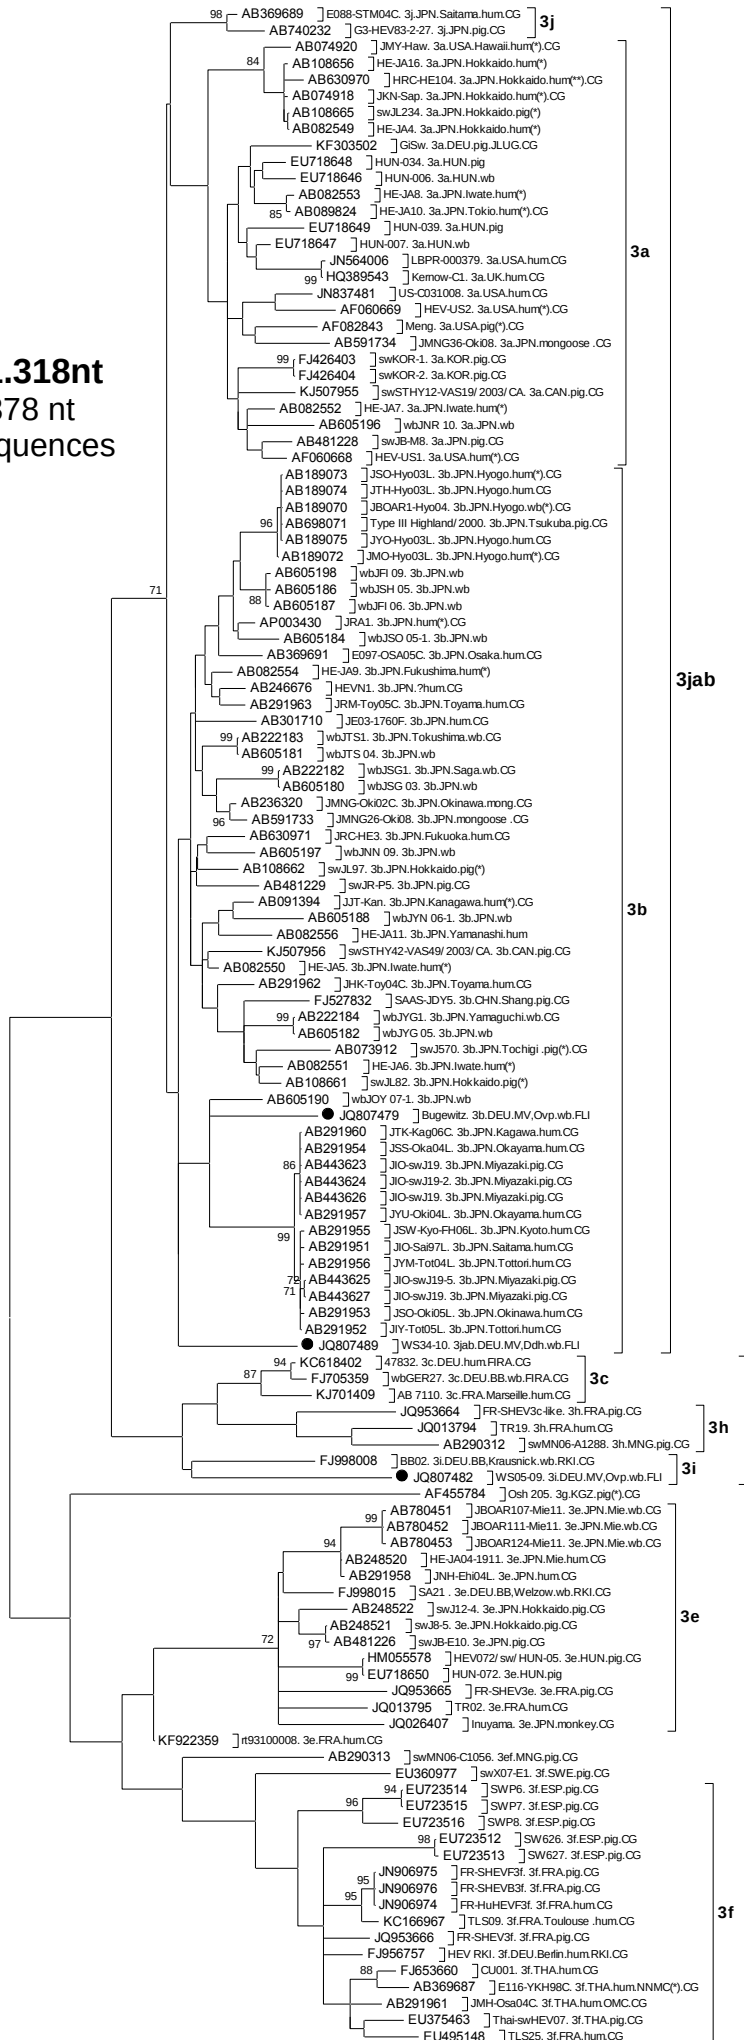

Supplement: s1 [file s1]
